# Supplementary material for: A mechanistic view of the reduction in photosynthetic protein abundance under diurnal light fluctuation
Source: PubMed Central journal article supplement — J Exp Bot. 2019 Apr 19;70(15):3705–8. doi: 10.1093/jxb/erz164 (PMC6685652; doi:10.1093/jxb/erz164), 2019-04-19
Supplement: erz164_suppl_supplementary_figure_s1.pdf [file erz164_suppl_supplementary_figure_s1.pdf]

## **Supplementary data**

VIEWPOINT

### **A mechanistic view of the reduction in photosynthetic protein abundance under diurnal light fluctuation**

Yi-Chen Pao, Hartmut Stützel, Tsu-Wei Chen

Institute of Horticultural Production Systems, Leibniz Universität Hannover, Hannover, Germany

Yi-Chen Pao

Email: [pao@gem.uni-hannover.de](mailto:pao@gem.uni-hannover.de)

Telephone: +49 511 762-19269

Fax: +49 511 762-3606

This work was carried out at the Institute of Horticultural Production Systems, Leibniz Universität Hannover.

Date of submission: 10 January 2019

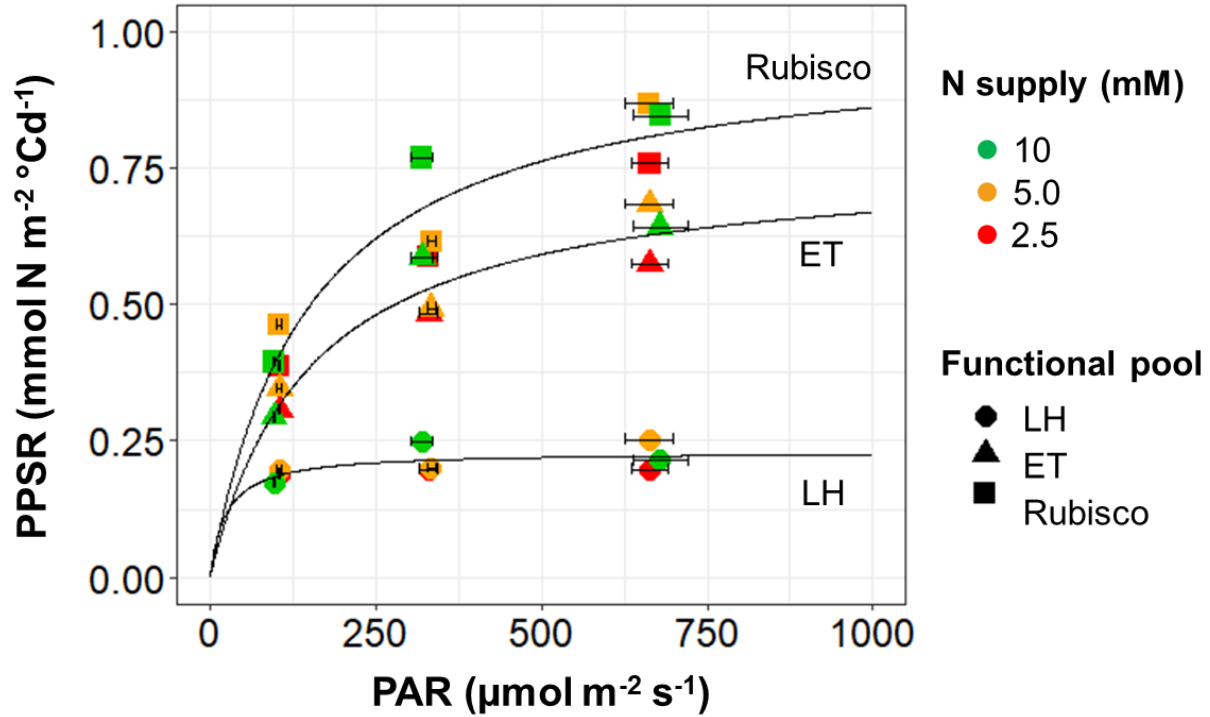

Fig. S1. Non-linear relationship between photosynthetic protein synthesis rate and light intensity. The data are from the growth chamber experiment described in Pao *et al.* (2018), where cucumber plants were grown under three light levels in combination with three nitrogen supply levels (mM), and photosynthetically functional pools in the leaves including Rubisco carboxylation, electron transport (ET), and light harvesting (LH) pools were examined as described in Pao *et al.* (2018). Light intensity of the growth environment is shown as mean photosynthetically active radiation (PAR,  $\mu\text{mol m}^{-2} \text{ s}^{-1}$ )  $\pm$  SE.
